# Supplementary material for: A turn-on fluorescent probe for selective detection of H2S in environmental samples and bio-imaging in human breast cancer cells
Source: Royal Society of Chemistry journal article supplement (doi:10.1039/d3ob01319g), 2023-01-01
Supplement: d3ob01319g1.pdf [file d3ob01319g1.pdf]

# **A turn-on fluorescent probe for selective detection of H<sub>2</sub>S in environmental samples and bio-imaging in human breast cancer cells**

Dipanjan Banik<sup>a</sup>, Anirban Karak<sup>a</sup>, Satyajit Halder<sup>b</sup>, Shilpita Banerjee<sup>a</sup>, Moumi Mandal<sup>a</sup>  
Anwasha Maiti<sup>a</sup>, Kuladip Jana<sup>b</sup>, Ajit Kumar Mahapatra<sup>a\*</sup>

<sup>a</sup>Molecular Sensor and Supramolecular Chemistry Laboratory, Department of Chemistry,  
Indian Institute of Engineering Science and Technology, Shibpur, Howrah-711103, West  
Bengal, India.

<sup>b</sup>Division of Molecular Medicine, Bose Institute, P 1/12, CIT Scheme VIIM, Kolkata 700054,  
India.

\*Author to whom correspondence should be addressed; electronic mail:

akmahapatra@chem.iiests.ac.in; Tel.: +91 – 9434508013

## Contents

| Description                                                                                                                    | Page  |
|--------------------------------------------------------------------------------------------------------------------------------|-------|
| 1. Experimental sections.....                                                                                                  | 3-5   |
| 2. Emission spectra of <b>TPB-OH</b> .....                                                                                     | 5     |
| 3. Plot of fluorescence change of <b>TPB-NO<sub>2</sub></b> against different concentrations of H <sub>2</sub> S.....          | 5     |
| 4. Calculation of fluorescence quantum yield of <b>TPB-NO<sub>2</sub></b> in the presence and absence of H <sub>2</sub> S..... | 6     |
| 5. Determination of the response time of probe <b>TPB-NO<sub>2</sub></b> .....                                                 | 6     |
| 6. Investigation of the reaction mechanism by using HRMS spectra.....                                                          | 7     |
| 7. Crystal Data and Structure Refinement Parameters of the probe <b>TPB-NO<sub>2</sub></b> .....                               | 8-9   |
| 8. Computational method.....                                                                                                   | 9-10  |
| 9. Live cell imaging study.....                                                                                                | 10-11 |
| 10. <sup>1</sup> H-NMR and <sup>13</sup> C-NMR spectrum of <b>TPB-NO<sub>2</sub></b> and <b>TPB-OH</b> .....                   | 11-13 |
| 11. ESI-MS Spectra of <b>TPB-NO<sub>2</sub></b> and <b>TPB-OH</b> .....                                                        | 13-14 |
| 12. Environmental water sample study by using probe <b>TPB-NO<sub>2</sub></b> .....                                            | 14    |
| 13. Selectivity toward H <sub>2</sub> S over various analytes.....                                                             | 15    |
| 14. Comparison table between reported H <sub>2</sub> S probes with our probe <b>TPB-NO<sub>2</sub></b> .....                   | 15-16 |
| 15. References.....                                                                                                            | 17-18 |

## 1. Experimental section

### Materials and Methods

The chemicals of Sigma-Aldrich company were used directly for synthesis purposes. Commercially supplied analytical grade solvents were used for all experiments. 60-120 mesh Silica gel (Spectrochem Pvt. Ltd. Mumbai, India) was used in column chromatography for the purification of products and Merck silica gel 60 F<sub>254</sub> plates were used for Thin layer chromatography (TLC). UV-vis spectra were done by using Shimadzu UV-1800 UV-vis spectrophotometer. A fluorescence spectrophotometer (Model 1057, Fluorolog, Horiba Scientific, USA) was used for recording Fluorescence spectra. <sup>1</sup>H and <sup>13</sup>C NMR spectra were performed by using Bruker Avance 400 MHz instrument where DMSO-d<sub>6</sub> and CDCl<sub>3</sub> were used as solvent and TMS as an internal standard. Mass spectra were carried out by using Waters Q-TOF YA 263 mass spectrometer.

### The general method of UV-vis and fluorescence titration

Both spectral measurements were done by preparing a stock solution of the probe **TPB-NO<sub>2</sub>** (4×10<sup>-5</sup>M) in a DMSO/H<sub>2</sub>O solution (1:1, v/v; 10 mM HEPES buffer, pH 7.4) by filling a quartz optical cell having a 1cm optical path length was filled with 2 ml probe solution (4×10<sup>-5</sup>M) and both the titration experiments were done by continuous addition of a 10 μM analyte stock solution (4×10<sup>-4</sup>M) to this probe solution (4×10<sup>-5</sup>M) by using a micropipette.

### Kinetic Study

To investigate the reaction kinetics of the probe **TPB-NO<sub>2</sub>** with H<sub>2</sub>S, first fluorescence intensity was plotted against time(seconds) to find out the response time and then the apparent rate constant (*k<sub>obs</sub>*) was calculated by putting the fluorescence intensity values in the pseudo-first-order equation:

$$\ln [(F_{\max} - Ft)/F_{\max}] = - k_{obs}t$$

where *F<sub>t</sub>* and *F<sub>max</sub>* denote the fluorescence intensities at 483 nm at time *t* and the maximum value acquired after the completion of the reaction respectively.

### Detection limit calculation

The fluorescence spectra of the blank probe **TPB-NO<sub>2</sub>**(1 × 10<sup>-5</sup> M) were recorded ten times to obtain the standard deviation. Then the fluorescence intensity was measured upon gradual addition of Na<sub>2</sub>S and a linear fit curve was found when intensity was plotted against the concentration of Na<sub>2</sub>S. Then by putting the value of standard deviation and slope in the equation 3σ/K (where σ is the standard deviation of the blank solution and K is the slope of the calibration curve), the detection limit was calculated.

## Synthesis of the probe

### Synthesis of compounds 2 and 3

Compounds 2 and 3 were synthesized according to the reported method.<sup>1</sup>

### Synthesis and characterization of 2-(benzo[d]thiazol-2-yl)-5-(diphenylamino)phenol (TPB-OH)

Compound 3 (210 mg, 0.726 mmol) was dissolved in anhydrous EtOH (20 ml). Then 2-amino thiophenol (0.117 ml, 1.08 mmol) and a catalytic amount of KHSO<sub>4</sub> were added to the mixture successively and refluxed for 5h. A yellow precipitate appeared. The precipitate was filtered and washed with cold EtOH to afford the yellowish-white powder of compound TPB-OH (197 mg, yield~ 69%).

**<sup>1</sup>H NMR (400 MHz, DMSO-d<sub>6</sub>):**  $\delta$  11.48 (s, 1H), 8.08 (d,  $J$  = 7.8 Hz, 1H), 7.98 (dd,  $J$  = 8.2, 5.7 Hz, 2H), 7.50 (t,  $J$  = 7.3 Hz, 1H), 7.43 – 7.36 (m, 5H), 7.19 (t,  $J$  = 7.8 Hz, 6H), 6.53 – 6.45 (m, 2H).

**<sup>13</sup>C NMR (101 MHz, DMSO-d<sub>6</sub>):**  $\delta$  165.69 (s), 157.84 (s), 152.06 (s), 151.63 (s), 146.54 (s), 134.16 (s), 130.31 (s), 130.00 (s), 126.78 (s), 126.47 (s), 125.23 (s), 124.96 (s), 122.29 (s), 121.98 (s), 112.40 (s), 111.99 (s), 107.06 (s).

**HRMS (ESI):  $m/z$  (%):** 395.1210 [TPB-OH + H]<sup>+</sup> (Calc. for C<sub>25</sub>H<sub>19</sub>N<sub>2</sub>OS<sup>+</sup>: 395.1213)

### Synthesis and characterization of 4-(benzo[d]thiazol-2-yl)-3-(2,4-dinitrophenoxy)-N, N-diphenylaniline (TPB-NO<sub>2</sub>)

First, compound TPB-OH (150 mg, 0.38 mmol) was dissolved in dry acetonitrile (18 ml). Then, K<sub>2</sub>CO<sub>3</sub> (63 mg, 0.456 mmol) was added to it, and stirred the mixture for 1h at room temperature. After that 2,4-dinitrofluorobenzene (85 mg, 0.456 mmol) was added to the reaction mixture and was stirred at room temperature for 6 h. After completion of the reaction (TLC monitored), the solvent was removed under vacuum. The residue was then washed with water and the organic part of the mixture was separated by using dichloromethane (30 ml×2). The collected organic layer was dried over anhydrous Na<sub>2</sub>SO<sub>4</sub> and then purified by column chromatography using DCM/hexane (1:1, V/V). The obtained product was then recrystallized from diethyl ether to give yellow crystals of TPB-NO<sub>2</sub> as pure product (108 mg, yield~ 50.67%).

**<sup>1</sup>H NMR (400 MHz, CDCl<sub>3</sub>):**  $\delta$  8.88 (d,  $J$  = 2.7 Hz, 1H), 8.24 (d,  $J$  = 9.0 Hz, 2H), 7.94 (d,  $J$  = 8.1 Hz, 1H), 7.79 (d,  $J$  = 7.7 Hz, 1H), 7.44 (t,  $J$  = 7.1 Hz, 1H), 7.39 – 7.29 (m, 6H), 7.18

(dd,  $J = 14.2, 7.4$  Hz, 7H), 7.07 (dd,  $J = 8.9, 2.3$  Hz, 1H), 7.00 (d,  $J = 9.3$  Hz, 1H), 6.75 (d,  $J = 2.3$  Hz, 1H).

$^{13}\text{C}$  NMR (101 MHz,  $\text{CDCl}_3$ ):  $\delta$  161.20 (s), 155.81 (s), 152.71 (s), 151.77 (s), 151.39 (s), 145.85 (s), 141.56 (s), 139.25 (s), 134.95 (s), 131.82 (s), 129.89 (s), 128.93 (s), 126.38 (s), 126.03 (s), 125.32 (s), 125.15 (s), 122.90 (s), 122.29 (s), 121.36 (s), 118.59 (s), 117.98 (s), 117.34 (s), 112.38 (s) ppm.

HRMS (ESI):  $m/z$  (%): 561.1226 [TPB-NO<sub>2</sub> + H]<sup>+</sup>. (Calc. for C<sub>31</sub>H<sub>21</sub>N<sub>4</sub>O<sub>5</sub>S<sup>+</sup>: 561.1227

## 2. Emission spectra of TPB-OH

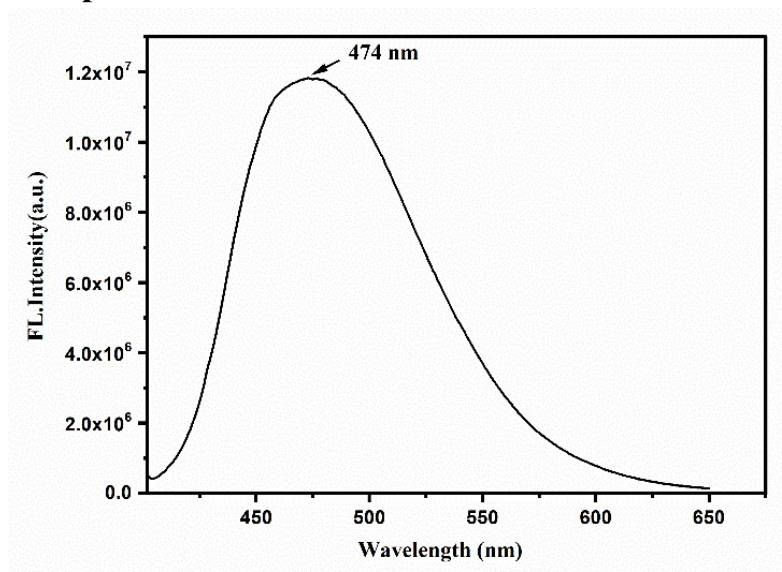

**Figure S1.** Emission spectra of TPB-OH ( $1 \times 10^{-5}$  M) in DMSO/H<sub>2</sub>O solution (1:1, v/v; 10 mM HEPES buffer, pH 7.4) ( $\lambda_{\text{ex}} = 390$  nm,  $\lambda_{\text{em}} = 474$  nm).

## 3. Plot of fluorescence change of TPB-NO<sub>2</sub> against different concentrations of H<sub>2</sub>S

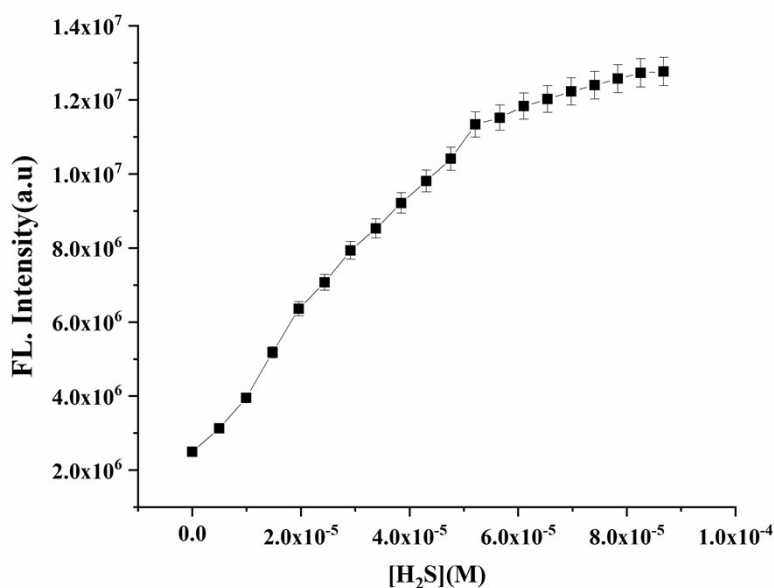

**Figure S2.** The plot of fluorescence intensity vs concentration of H<sub>2</sub>S

#### 4. Calculation of fluorescence quantum yield of TPB-NO<sub>2</sub> in the presence and absence of H<sub>2</sub>S

Here, the fluorescence quantum yield  $\Phi$  was calculated by using the following equation:

$$\Phi_x = \Phi_s (F_x / F_s) (A_s / A_x) (\eta_x^2 / \eta_s^2)$$

Where,

X and S indicate the unknown and standard solution respectively,  $\Phi$  = quantum yield

F = Area under the emission curve, A = Absorbance at the excitation wavelength,

$\eta$  = Refractive index of solvent. Here  $\Phi$  measurements were performed using fluorescein in ethanol as standard [ $\Phi = 0.79$ ]

$\eta_s = 1.361$  (for ethanol);  $\eta_x = 1.479$  (for DMSO)

In the absence of H<sub>2</sub>S, the calculated quantum yield ( $\Phi_x$ ) for probe TPB-NO<sub>2</sub> = 0.0189. where,  $\Phi_s = 0.79$ ,  $F_x = 2.64 \times 10^8$ ,  $F_s = 4.34 \times 10^8$ ,  $A_s = 0.008$ ,  $A_x = 0.239$ .

In the presence of H<sub>2</sub>S the calculated quantum yield ( $\Phi_x$ ) = 0.0931. Where,  $\Phi_s = 0.79$ ,  $F_x = 1.38 \times 10^9$ ,  $F_s = 4.34 \times 10^8$ ,  $A_s = 0.008$ ,  $A_x = 0.254$ .

#### 5. Determination of the response time of probe TPB-NO<sub>2</sub>

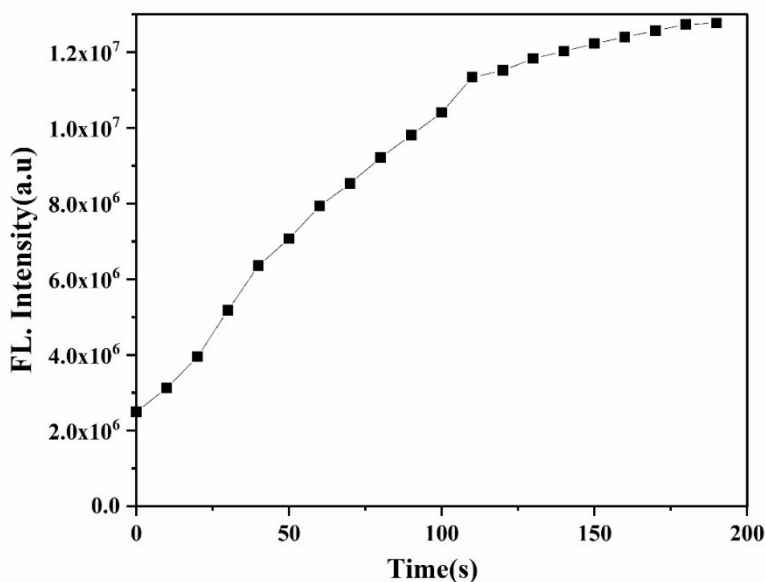

**Figure S3.** Time course (0–180 s) of fluorescence enhancement of TPB-NO<sub>2</sub> (10.0  $\mu$ M) in DMSO/H<sub>2</sub>O solution (1:1, v/v) solution upon addition of 80  $\mu$ M of Na<sub>2</sub>S ( $\lambda_{ex} = 390$  nm;  $\lambda_{em} = 483$  nm).

## 6. Investigation of the reaction mechanism by using HRMS spectra

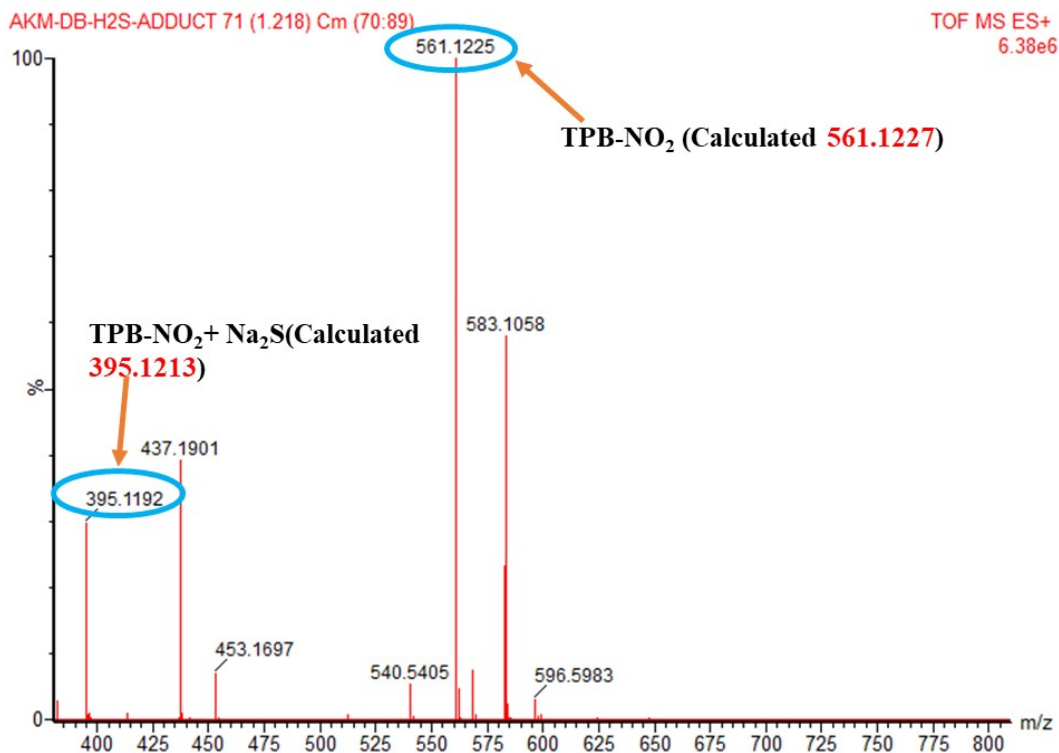

**Figure S4.** HRMS spectra were taken after a few minutes of reaction between probe TPB-NO<sub>2</sub> and Na<sub>2</sub>S.

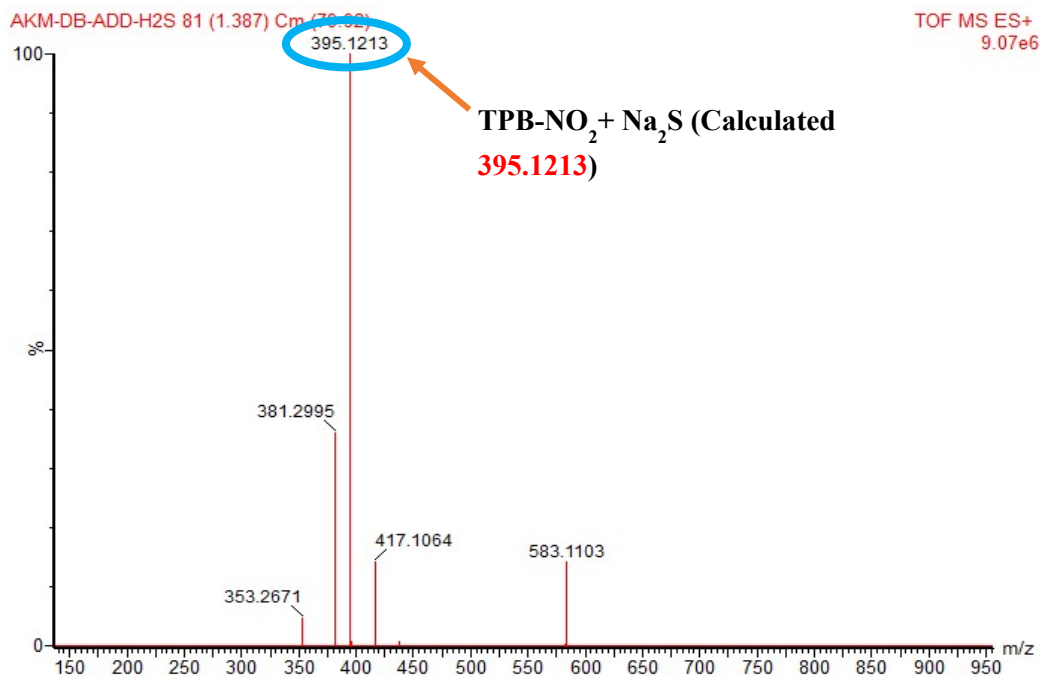

**Figure S5.** HRMS spectra were taken after 1 hour of the reaction between probe TPB-NO<sub>2</sub> and Na<sub>2</sub>S.

**7. Table S1 Crystal Data and Structure Refinement Parameters of the probe TPB-NO<sub>2</sub>**

|                                               |                                                                 |
|-----------------------------------------------|-----------------------------------------------------------------|
| Empirical formula                             | C <sub>31</sub> H <sub>20</sub> N <sub>4</sub> O <sub>5</sub> S |
| Formula Weight                                | 560.57                                                          |
| Temperature (K)                               | 188                                                             |
| Wavelength (Å)                                | 0.71073                                                         |
| Crystal system                                | Triclinic                                                       |
| space group                                   | P $\bar{1}$                                                     |
| a, b, c (Å)                                   | 8.090(4), 11.340(6),<br>15.677(8)                               |
| $\alpha$ , $\beta$ , $\gamma$ (°)             | 73.356(17), 87.625(16),<br>79.487(17)                           |
| Volume (Å <sup>3</sup> )                      | 1354.7(12)                                                      |
| Z / Density (calc.)<br>(Mg/m <sup>3</sup> )   | 2/ 1.374                                                        |
| Absorption<br>coefficient (mm <sup>-1</sup> ) | 0.169                                                           |
| F(000)                                        | 580.0                                                           |
| Crystal size (mm <sup>3</sup> )               | 0.18 x 0.13 x 0.08                                              |
| $\theta$ range for data<br>collection         | 2.634 to 27.263                                                 |
| Completeness to $\theta$<br>(%)               | 100%                                                            |
| Absorption correction                         | Multi-scan                                                      |
| Max. and min.<br>transmission                 | 0.987 and 0.974                                                 |
| Refinement method                             | Full-matrix least-squares                                       |



|                                                  |                                                   |
|--------------------------------------------------|---------------------------------------------------|
|                                                  | on F <sup>2</sup>                                 |
| Data/parameters                                  | 6095/ 370                                         |
| Goodness-of-fit on F <sup>2</sup>                | 1.008                                             |
| Final R indices [I > 2σ(I)]                      | R <sub>1</sub> = 0.0711, wR <sub>2</sub> = 0.2105 |
| R indices (all data)                             | R <sub>1</sub> = 0.0929, wR <sub>2</sub> = 0.2420 |
| Largest diff. peak and hole (e.Å <sup>-3</sup> ) | 0.375 and -0.508                                  |

$$R_1 = \frac{\sum ||F_o| - |F_c||}{\sum |F_o|}, wR_2 = \left[ \frac{\sum \{(F_o^2 - F_c^2)^2\}}{\sum \{w(F_o^2)^2\}} \right]^{1/2} w = 1 / \{ \sigma^2(F_o^2) + (aP)^2 + bP \}, P = (F_o^2 + 2F_c^2)/3, \text{ where, } a = 0.1739 \text{ and } b = 0.0766.$$

## 8. Computational method

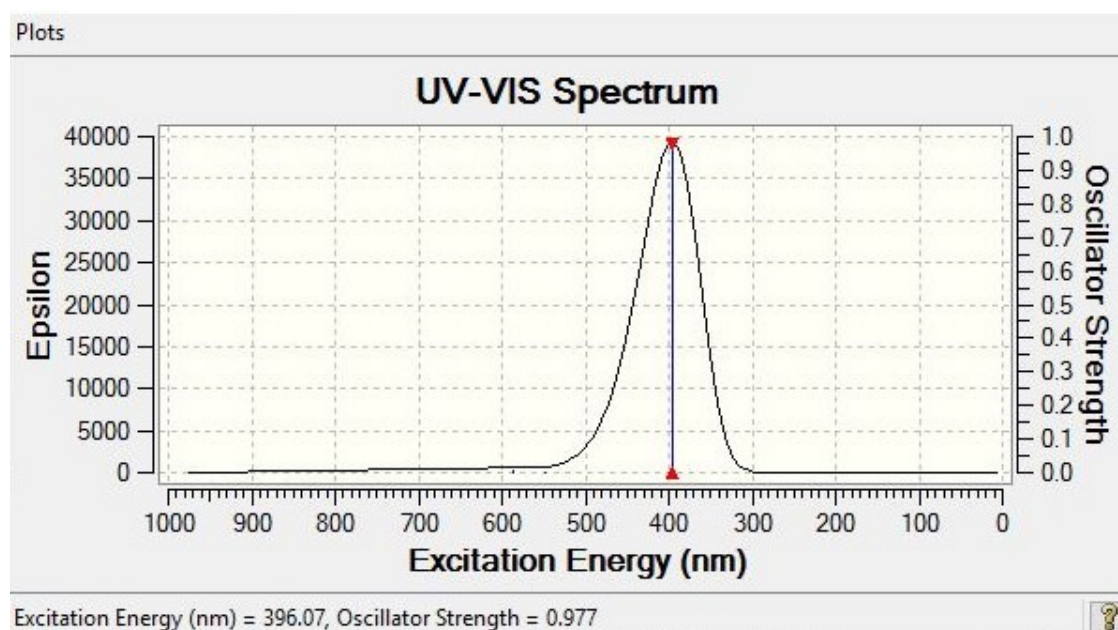

**Figure S6.** Absorption spectra of the Probe **TPB-NO<sub>2</sub>**

**Table S2:** The main vertical orbital transition of the Probe **TPB-NO<sub>2</sub>** calculated by TD-DFT method:

| Energy (eV) | Wavelength (nm) | Osc. Strength (f) | Transition    |
|-------------|-----------------|-------------------|---------------|
| 3.1303      | 396.07          | 0.9770            | HOMO → LUMO+2 |
| 2.2630      | 547.87          | 0.0003            | HOMO → LUMO+1 |
| 2.1123      | 586.97          | 0.0069            | HOMO → LUMO   |

## 9. Live cell imaging study

### Cytotoxicity assay

The cytotoxic impact of the ligand TPB-NO<sub>2</sub> was assessed by means of the MTT cell proliferation assay<sup>2,3</sup> conducted on both the MDA-MB-231 cancer cell line and the NKE normal cell line. To elucidate, cells were initially seeded in 96-well plates with a density of  $1 \times 10^4$  cells per well, allowing 24 hours for adherence before exposure to varying concentrations of the TPB-NO<sub>2</sub> ligand (0  $\mu$ M, 10  $\mu$ M, 20  $\mu$ M, 40  $\mu$ M, 80  $\mu$ M, 100  $\mu$ M) for the duration of 24 hrs. Post-treatment media was discarded from each well and washed with 1x PBS, following each well underwent treatment with 0.5 mg/ml of MTT solution and incubated for 4 hours, followed by a rinse with 1x PBS. The ensuing formazan crystals were dissolved in DMSO, and the microplate reader recorded absorbance at 570 nm. The measurement of cell viability was expressed as a percentage of the control experimental setup.

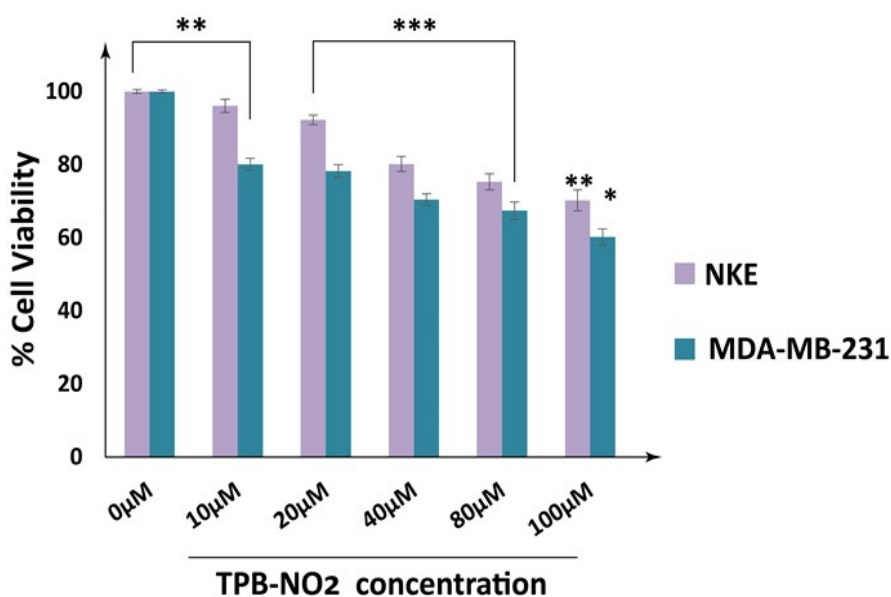

**Figure S7.** Cell survivability of MDA-MB 231 and NKE cells exposed to different ligand TPB-NO<sub>2</sub> concentrations. Data are representative of at least three independent experiments and the bar graph shows mean ± SEM, \*\*\**p* < 0.0001, \*\**p* < 0.001, \**p* < 0.01 were interpreted as statistically significant, as compared with the control.

### Fluorescence imaging:

Fluorescence imaging was conducted on the MDA-MB 231 cell line to visualize the fluorescence capability of the TPB-NO<sub>2</sub> in the presence of H<sub>2</sub>S (10 μM). In brief, cells were cultured on coverslips for 24 hours at 37°C in a humidified environment with 5% CO<sub>2</sub>. Subsequently, pretreatment with N-Ethylmaleimide (NEM) was carried out to eliminate thiol-containing molecules and endogenous Cys. Then cells were washed with PBS and mock-treated with 10 μM of the TPB-NO<sub>2</sub> ligand and on another set-up NEM pre-treated cells were then incubated with 10 μM of the TPB-NO<sub>2</sub> ligand for the time period of 1 hour, following this, the cells underwent treatment with H<sub>2</sub>S (10 μM) and incubated for 10 minutes and 20 minutes. Later cells were washed with PBS to remove any unbound TPB-NO<sub>2</sub> and transferred onto a glass slide for examination using an Olympus fluorescence microscope.<sup>4,5</sup>

### 10. NMR Spectra: <sup>1</sup>H-NMR, <sup>13</sup>C-NMR

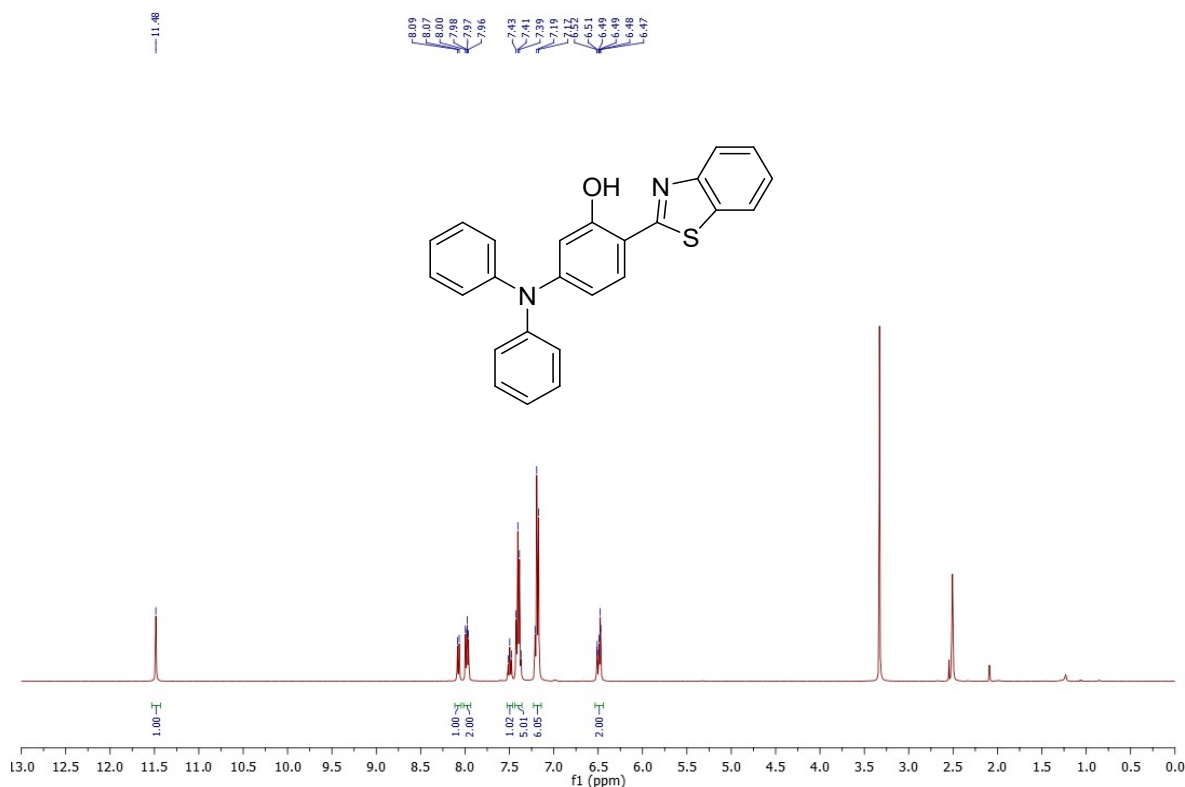

**Figure S8.** <sup>1</sup>H NMR spectrum of the compound TPB-OH in DMSO-d<sub>6</sub>

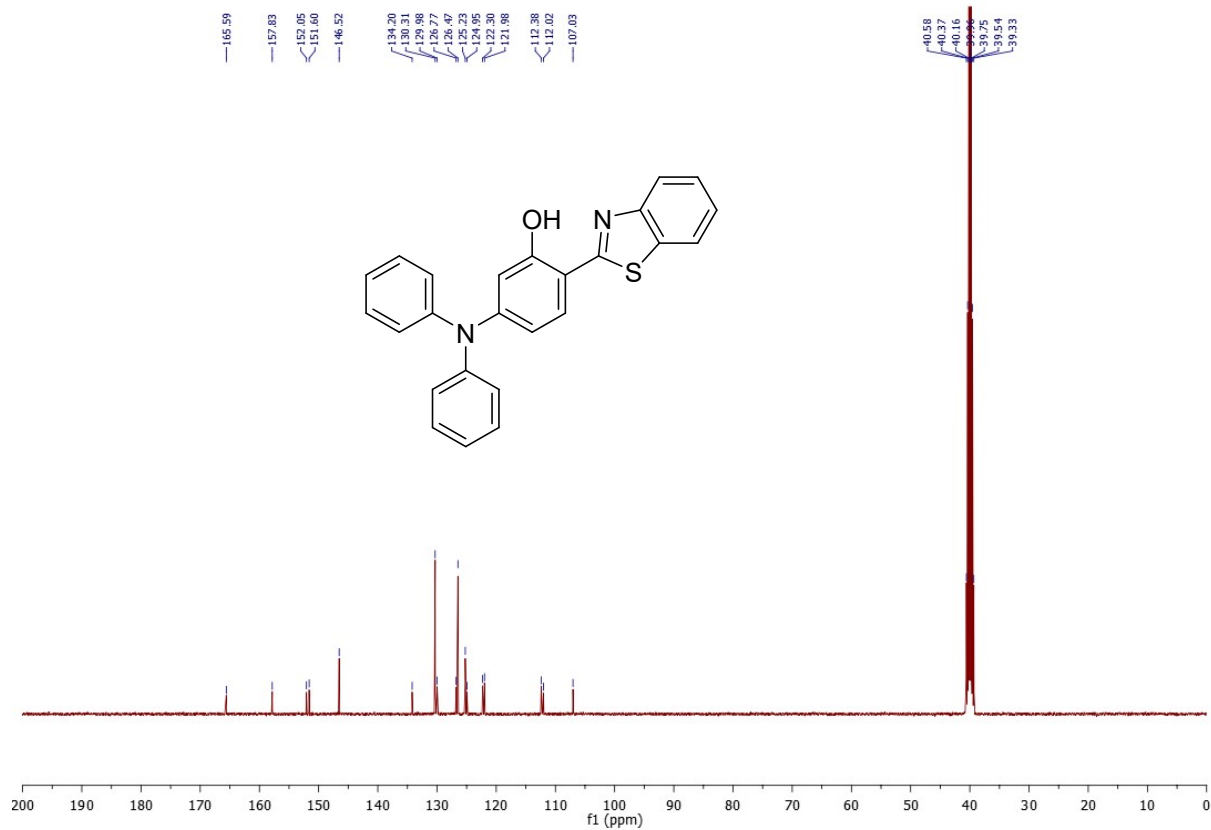

Figure S9. <sup>13</sup>C NMR spectrum of the compound TPB-OH in DMSO-d<sub>6</sub>

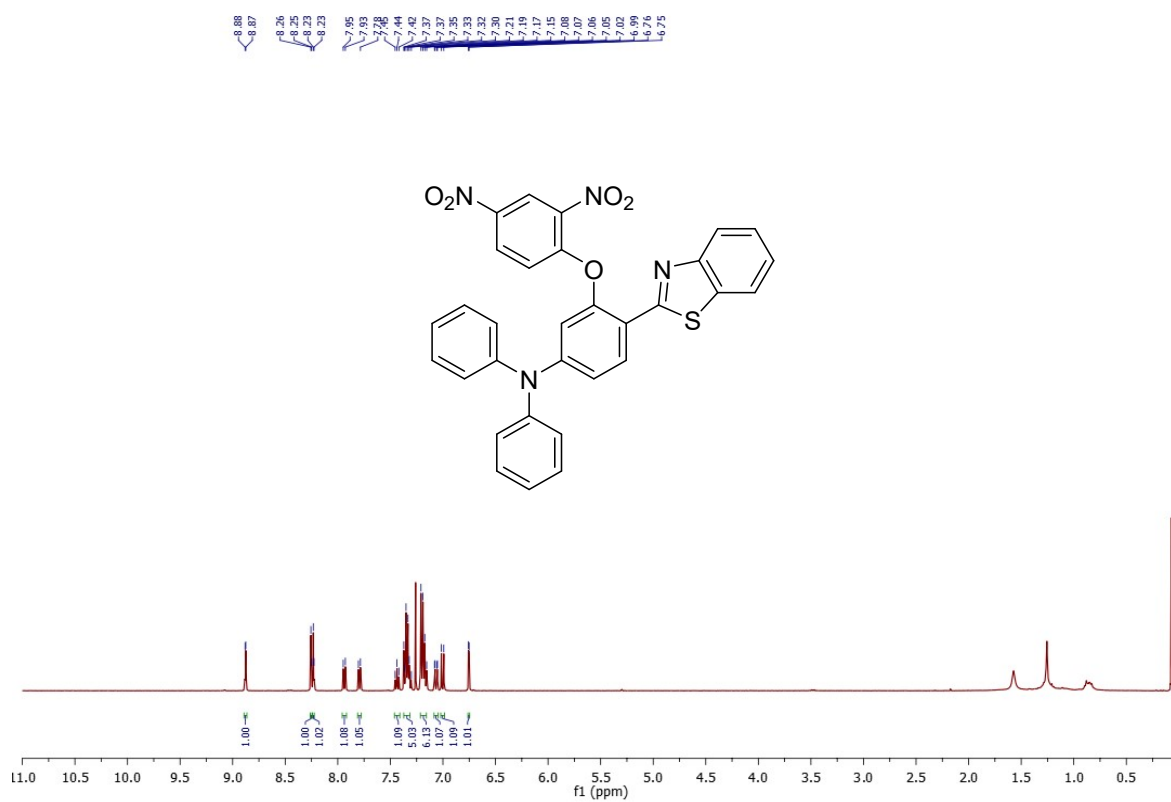

Figure S10. <sup>1</sup>H NMR spectrum of the compound TPB-NO<sub>2</sub> in CDCl<sub>3</sub>

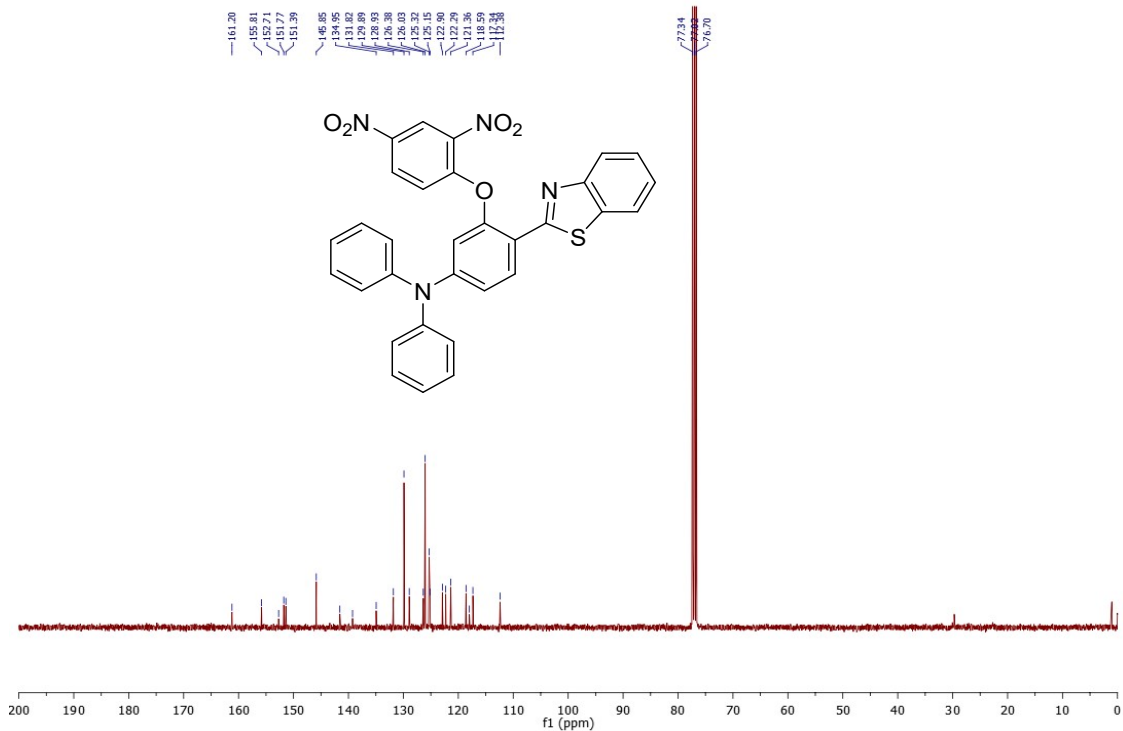

Figure S11. <sup>13</sup>C NMR spectrum of the compound TPB-NO<sub>2</sub> in CDCl<sub>3</sub>

## 11. ESI-MS Spectra

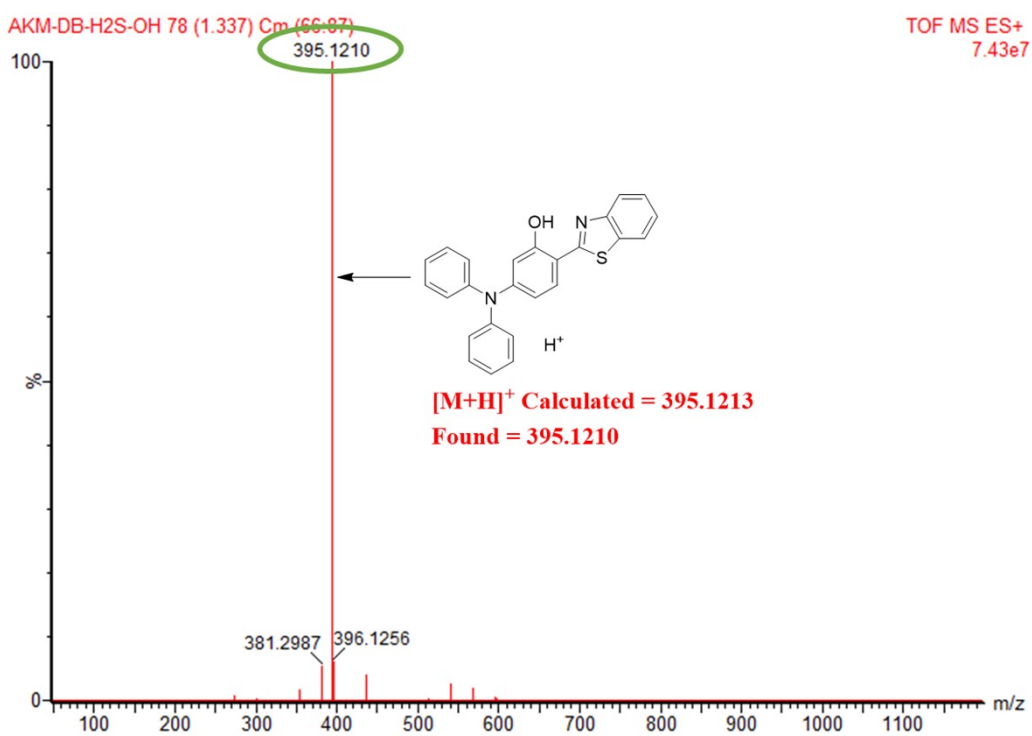

Figure S12. HRMS spectra of the compound TPB-OH

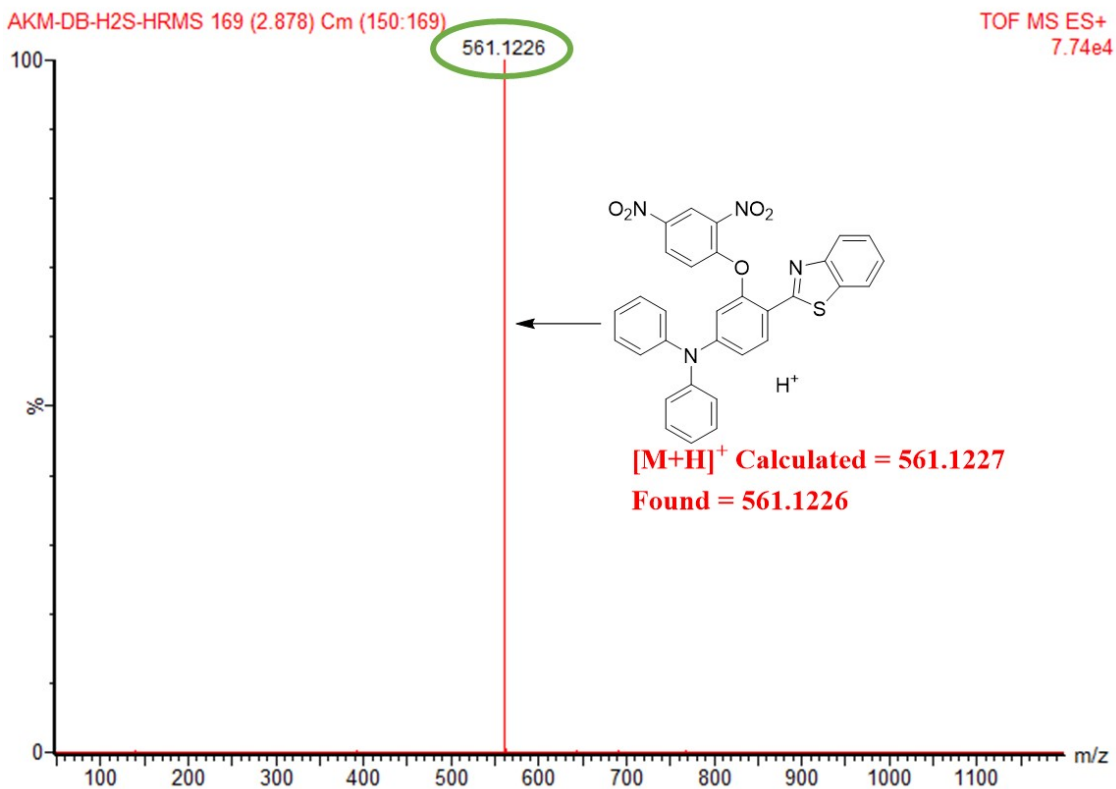

Figure S13. HRMS spectra of the compound TPB-NO<sub>2</sub>

## 12. Table S3 Environmental water sample study by using probe TPB-NO<sub>2</sub>

| Water sample       | H <sub>2</sub> S spiked (μM) | Found (μM)  | % Recovery | RSD (%) |
|--------------------|------------------------------|-------------|------------|---------|
| Tap water          | 2.0                          | 1.92 ± 0.09 | 96.0       | 4.69    |
|                    | 4.0                          | 3.40 ± 0.22 | 85.0       | 6.47    |
|                    | 6.0                          | 5.82 ± 0.15 | 97.0       | 2.57    |
|                    | 8.0                          | 8.02 ± 0.35 | 100.25     | 4.36    |
| Ganges River water | 2.0                          | 1.97 ± 0.15 | 98.50      | 7.61    |
|                    | 4.0                          | 4.05 ± 0.25 | 101.25     | 6.17    |
|                    | 6.0                          | 5.92 ± 0.20 | 98.66      | 3.38    |
|                    | 8.0                          | 8.07 ± 0.35 | 100.87     | 4.34    |
| Lake Water         | 2.0                          | 1.88 ± 0.17 | 94.0       | 9.04    |
|                    | 4.0                          | 3.97 ± 0.32 | 99.25      | 8.06    |
|                    | 6.0                          | 6.08 ± 0.42 | 101.33     | 6.90    |
|                    | 8.0                          | 8.06 ± 0.43 | 100.75     | 5.33    |

### 13. Selectivity toward H<sub>2</sub>S over various analyte

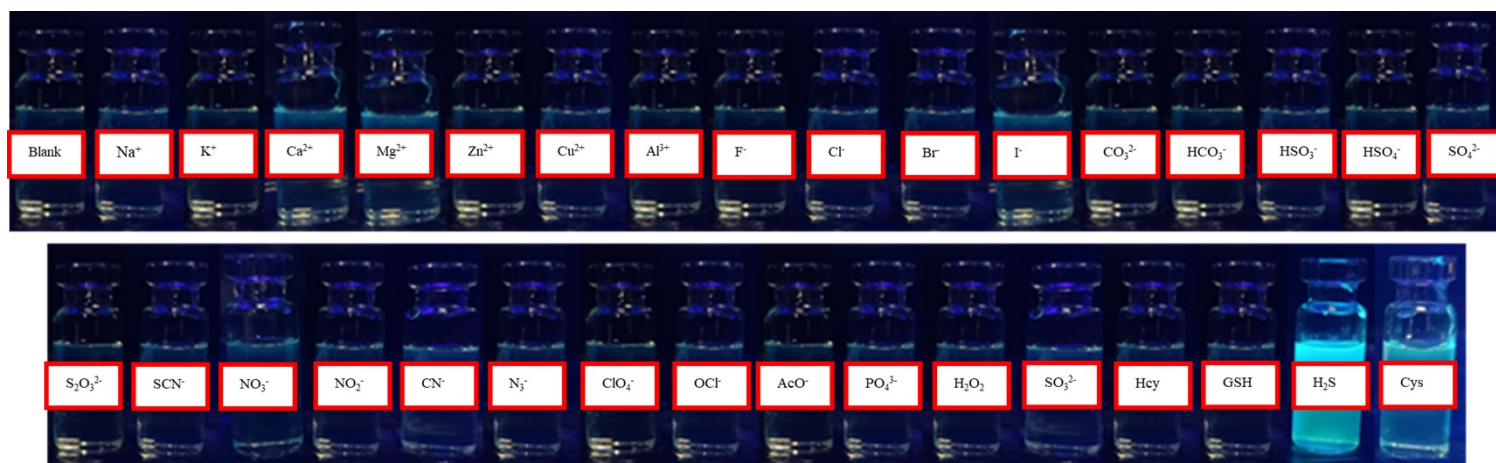

**Figure S14.** Fluorescence color change of the probe TPB-NO<sub>2</sub> in DMSO/H<sub>2</sub>O solution (1:1, v/v; 10 mM HEPES buffer, pH 7.4) upon the addition of various analytes under a UV lamp.

### 14. Table S4 Comparison table of important parameters between reported H<sub>2</sub>S probes with our probe TPB-NO<sub>2</sub>

| Structure of the probe                                                             | Solvent system                                          | Mode of sensing          | LOD     | Response time | Applications                       | Cell imaging | Cytotoxicity assay                                | Ref |
|------------------------------------------------------------------------------------|---------------------------------------------------------|--------------------------|---------|---------------|------------------------------------|--------------|---------------------------------------------------|-----|
|                                                                                    |                                                         |                          |         |               | Water sample/TLC strip/Food sample |              | Human cancer cell line/human epithelial cell line |     |
| 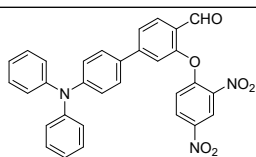 | THF/H <sub>2</sub> O (2/8, v/v, HEPES 20 mM, pH = 7.12) | FL Turn-on/AIE           | 7.63 μM | 20 min        | Yes/No/No                          | Yes          | Yes/No                                            | 6   |
|  | PBS buffer (10 mM, containing 50% DMSO, pH = 6).        | FL Turn-on               | 90 nM   | -             | Yes/No/No                          | Yes          | Yes/No                                            | 7   |
|  | PBS (20 mM, pH = 7.4, 10% DMSO, v/v)                    | FL Turn-on/PET           | 1.11 μM | 4.5 min       | No/No/No                           | Yes          | Yes/No                                            | 8   |
|  | PBS buffer (10% EtOH, pH=7.4)                           | FL Turn-on/PET and ESIPT | 0.61 μM | 9 min         | No/No/No                           | Yes          | Yes/No                                            | 9   |

|                                                                                    |                                                                       |                           |         |         |                           |     |         |           |
|------------------------------------------------------------------------------------|-----------------------------------------------------------------------|---------------------------|---------|---------|---------------------------|-----|---------|-----------|
| 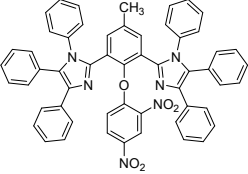   | HEPES buffer (10mM containing 1% DMSO, pH=7.4)                        | FL Turn-on/ESIPT          | 0.13 nM | 16 min  | Yes/Yes (Filter Paper)/No | Yes | Yes/No  | 10        |
|    | PBS buffer                                                            | FL Turn-on/PET            | 90 nM   | 30 min  | No/No/No                  | Yes | No/No   | 11        |
|    | PBS buffer (1% DMSO)                                                  | FL Turn-on                | 0.28 μM | 5 min   | Yes/No/No                 | No  | No/No   | 12        |
|   | PBS (20 mM, pH =7.4, 5% MeOH)                                         | FL Turn-on                | 71 nM   | 25 min  | No/No/No                  | Yes | Yes/No  | 13        |
|  | HEPES buffer solution (20 mM, pH 7.4, 10% CH <sub>3</sub> CN)         | FL Turn-on                | 0.12 μM | 2 min   | No/No/No                  | Yes | Yes/No  | 14        |
|  | DMSO/H <sub>2</sub> O solution (1:1, v/v; 10 mM HEPES buffer, pH 7.4) | FL Turn-on/Colometric/PET | 9.81 nM | < 2 min | Yes/Yes/Yes               | Yes | Yes/Yes | This work |



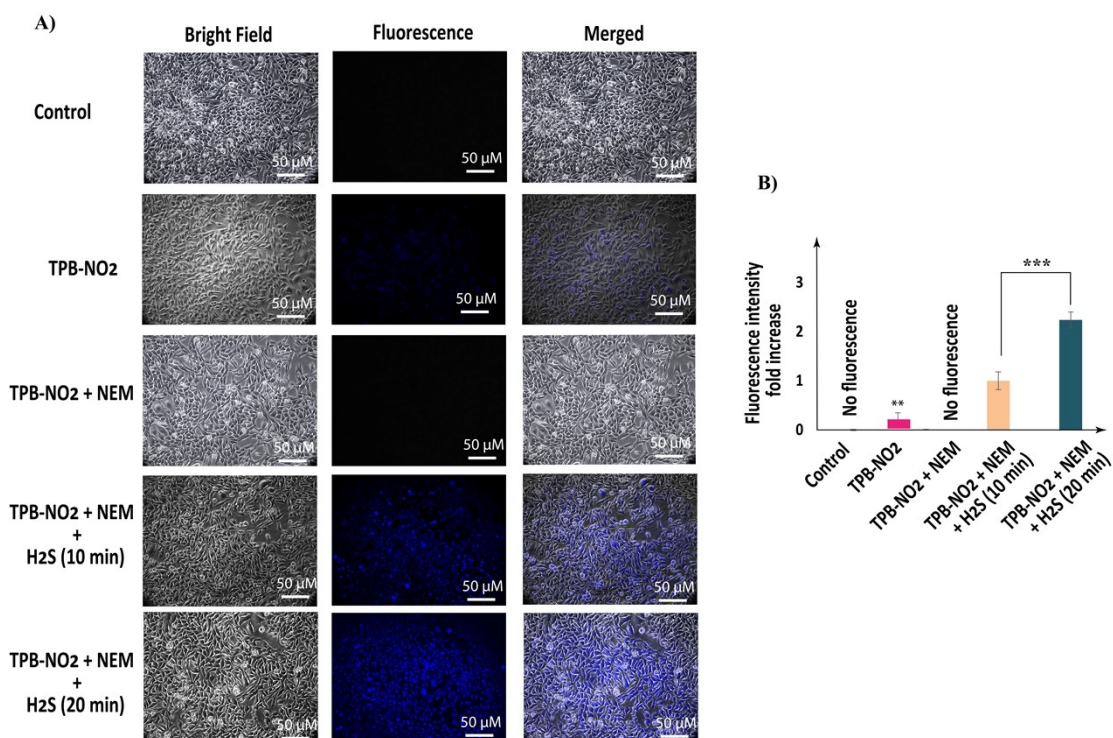

**Fig S15:** A) Fluorescence Microscopic images and B) fold increase in fluorescence intensity of untreated MDA-MB 231 cells (Control), cells treated with only 10  $\mu\text{M}$  of ligand TPB-NO<sub>2</sub>, NEM pre-treated cells treated with 10  $\mu\text{M}$  of ligand TPB-NO<sub>2</sub> and NEM+ ligand TPB-NO<sub>2</sub> (10  $\mu\text{M}$ ) in the presence of H<sub>2</sub>S (10  $\mu\text{M}$ ) together after 10 min and 20 min incubation periods under bright, fluorescence and merge field.

## 15. References

- 1) S.S.Ali, A. Gangopadhyay, A. K. Pramanik, U. N. Guria, S. K. Samanta, A. K. Mahapatra, *Dyes Pigm.*, 2019, **170**, 107585.
- 2) P.R. Twentyman, M. Luscombe, *Br J Cancer*. 1987, **56**, 279-85.
- 3) S.Paul, S. Maity, S. Halder, B. Dutta, S. Jana, K. Jana, C. Sinha, *Dalton Trans.*, 2022, **51**, 3198-3212.
- 4) S.K. Samanta, K. Maiti, S. Halder, U.N. Guria, D. Mandal, K. Jana, A.K. Mahapatra, *Org Biomol Chem.*, 2023, **21**, 575-584.
- 5) M.Mandal, D. Sain, Md. M. Islam, D. Banik, M. Periyasamy, S. Mandal, A. K. Mahapatra, A. Kar, *Anal. Methods*, 2021, **13**, 3922.

- 6) J. Li, K. Zhong, L. Tang, and X. Yan, *New J. Chem.*, 2021, **45**, 13399.
- 7) J. Cui, T. Zhang, Y.-Q. Sun, D.-P. Li, J.-T. Liu, B.-X. Zhao, *Sens. Actuators B: Chem.*, 2016, **232**, 705–711.
- 8) S. Peng, T. Zhong, T. Guo, D. Shu, D. Meng, H. Liu, and D. Guo, *NewJ.Chem.*, 2018, **42**, 5185.
- 9) Y. Lu, B. Dong, W. Song, X. Kong, A. H. Mehmood and W. Lin, *Anal.Methods*, 2019, **11**, 3301.
- 10) A. Gomathi, P. Viswanathamurthi, *J. Photochem. Photobiol. A.*, 2019, **369**, 97–105.
- 11) S. Chen, P. Hou, X. Song, *Sens. Actuators B: Chem.*, 2015, **221**, 951–955.
- 12) Y. Jin, R. Liu, Z. Zhan, Y. Lv, *Talanta*, , 2019, **202**, 159-164.
- 13) X. Song, B. Dong, X. Kong, C. Wang, N. Zhang, and W. Lin, *RSC Adv.*, 2017, **7**, 15817.
- 14) Q. Chen, J. Yang, Y. Li, J. Zheng, R. Yang, *Anal. Chim. Acta.*, 2015, **896**, 128-136.
